# Supplementary material for: An umbrella review of meta-analyses of school-based Mindfulness Based Interventions (MBIs)
Source: Research Square preprint supplement (doi:10.21203/rs.3.rs-6932647/v1), 2025-06-29
Supplement: Supplementary file 1 [file 49d3db49e72f90f786d9d9ab.docx]

**Supplementary Information**

Appendix A. Search Strategy

Appendix B. Included and excluded reviews

Appendix C. Table S1. AMSTAR-2 Quality ratings for reviews

Appendix D. Table S2. GRADE ratings for included reviews

**Appendix A: Search Strategy**

**Search in Title and Abstract**

**Search string:** (mindful*) AND (program* OR intervention* OR therap*) AND (school*) AND (child* OR adolesc* OR young* OR youth*) AND (wellbeing* OR well-being OR anxi* OR depress*) AND (meta-analys* OR meta analys* OR meta-synth* OR meta synth*)

**1. Search Strategy: PubMed**

Limit to:

- Article types –Meta-Analysis only
- Years: 01/01/2000 – 31/12/2024
- Language – English
- Species – Humans
- Age – Birth – 18yrs

**2. Search Strategy: PsychInfo**

Limit to:

- Peer Reviewed
- Years: 01/01/2000 – 31/12/2024
- Language – English
- Source type – Scholarly journals
- Document type – Article

**3. Search Strategy: ERIC**

Limit to:

- Peer Reviewed
- Years: 01/01/2000 – 31/12/2024
- Language – English language
- Publication Type Include: Academic Journals

**4. Search Strategy: CINAHL**

Limit to:

- Peer Reviewed
- Years: 01/01/2000 – 31/12/2024
- Language – English language
- Publication Type Include: Academic Journals

**5. Search Strategy: CDSR**

#1 (mindful*) AND (program* OR intervention* OR therap*) AND (school*) AND (child* OR adolesc* OR young* OR youth*) AND (wellbeing* OR well-being OR anxi* OR depress*)

(Limited to Cochrane Reviews)

#2 (meta-analys* OR meta analys* OR meta-synth* OR meta synth*)

(Limited to Cochrane Reviews)

#3 #1 AND #2 (Limited to Cochrane Reviews)

**Appendix B: Included and excluded reviews**

**Included reviews**

Carsley, D., Khoury, B., & Heath, N. L. (2018). Effectiveness of mindfulness interventions for mental health in schools: A comprehensive meta-analysis. *Mindfulness*, *9*(3), 693-707. <https://doi.org/10.1007/s12671-017-0839-2>

Dunning, D., Tudor, K., Radley, L., Dalrymple, N., Funk, J., Vainre, M., Ford, T., Montero-Marin, J., Kuyken, W., & Dalgleish, T. (2022). Do mindfulness-based programmes improve the cognitive skills, behaviour and mental health of children and adolescents? An updated meta-analysis of randomised controlled trials. *Evidence-based mental health*, *25*(3), 135-142. <https://doi.org/10.1136/ebmental-2022-300464>

Fulambarkar, N., Seo, B., Testerman, A., Rees, M., Bausback, K., & Bunge, E. (2023). Review: Meta‐analysis on mindfulness‐based interventions for adolescents' stress, depression, and anxiety in school settings: A cautionary tale. *Child and Adolescent Mental Health*, *28*(2), 307-317. <https://doi.org/10.1111/camh.12572>

Galla, B., Karanam, A., Pelakh, A., & Goldberg, S. B. (2024). Adolescents do not benefit from universal school-based mindfulness interventions: A reanalysis of dunning et al. (2022). *Frontiers in Psychology*, *15*, 1384531. <https://doi.org/https://doi.org/10.3389/fpsyg.2024.1384531>

Kander, T. N., Lawrence, D., Fox, A., Houghton, S., & Becerra, R. (2024). Mindfulness-based interventions for preadolescent children: A comprehensive meta-analysis. *J Sch Psychol*, *102*, 101261. <https://doi.org/10.1016/j.jsp.2023.101261>

Odgers, K., Dargue, N., Creswell, C., Jones, M. P., & Hudson, J. L. (2020). The limited effect of mindfulness-based interventions on anxiety in children and adolescents: A meta-analysis. *Clinical Child and Family Psychology Review*, *23*(3), 407-426. <https://doi.org/https://doi.org/10.1007/s10567-020-00319-z>

**Excluded reviews (grouped by reason for exclusion)**

Incorrect age

Reangsing, C., Punsuwun, S., & Schneider, J. K. (2021). Effects of mindfulness interventions on depressive symptoms in adolescents: A meta-analysis. *Int J Nurs Stud*, *115*, 103848. <https://doi.org/10.1016/j.ijnurstu.2020.103848>

Zhou, X., Guo, J., Lu, G., Chen, C., Xie, Z., Liu, J., & Zhang, C. (2020). Effects of mindfulness-based stress reduction on anxiety symptoms in young people: A systematic review and meta-analysis. *Psychiatry Res*, *289*, 113002. <https://doi.org/10.1016/j.psychres.2020.113002>

Incorrect study design

Black, D. S. (2015). Mindfulness training for children and adolescents. In K. W. Brown, J. D. Creswell, & R. M. Ryan (Eds.), Handbook of mindfulness: Theory, research, and practice (pp. 283–299). The Guilford Press.

Burke, C. A. (2010). Mindfulness-based approaches with children and adolescents: A preliminary review of current research in an emergent field. *Journal of Child and Family Studies*, *19*(2), 133-144. <https://doi.org/10.1007/s10826-009-9282-x>

Felver, J. C., Celis-de Hoyos, C. E., Tezanos, K., & Singh, N. N. (2016). A systematic review of mindfulness-based interventions for youth in school settings. *Mindfulness*, *7*(1), 34-45. <https://doi.org/10.1007/s12671-015-0389-4>

Phillips, S., & Mychailyszyn, M. (2022). The effect of school-based mindfulness interventions on anxious and depressive symptoms: A meta-analysis. *School mental health*, *14*(3), 455-469. <https://doi.org/10.1007/s12310-021-09492-0>

Zenner, C., Herrnleben-Kurz, S., & Walach, H. (2014). Mindfulness-based interventions in schools-a systematic review and meta-analysis. *Frontiers in Psychology*, *5*, 603-603. <https://doi.org/10.3389/fpsyg.2014.00603>

Incorrect outcomes

Black, D. S., Milam, J., & Sussman, S. (2009). Sitting-meditation interventions among youth: A review of treatment efficacy. *Pediatrics*, *124*(3), e532-e541. <https://doi.org/10.1542/peds.2008-3434>

Lee, Y. C., Chen, C. R., & Lin, K. C. (2022). Effects of mindfulness-based interventions in children and adolescents with adhd: A systematic review and meta-analysis of randomized controlled trials. *Int J Environ Res Public Health*, *19*(22). <https://doi.org/10.3390/ijerph192215198>

Maynard, B. R., Maynard, B. R., Maynard, B. R., Solis, M. R., Solis, M. R., Solis, M. R., Miller, V. L., Miller, V. L., Miller, V. L., Brendel, K. E., Brendel, K. E., & Brendel, K. E. (2017). Mindfulness‐based interventions for improving cognition, academic achievement, behavior, and socioemotional functioning of primary and secondary school students. *Campbell Systematic Reviews*, *13*(1), 1-144. <https://doi.org/https://doi.org/10.4073/CSR.2017.5>

Mettler, J., Khoury, B., Zito, S., Sadowski, I., & Heath, N. L. (2023). Mindfulness-based programs and school adjustment: A systematic review and meta-analysis. *J Sch Psychol*, *97*, 43-62. <https://doi.org/10.1016/j.jsp.2022.10.007>

Incorrect intervention

Caldwell, D. (2019). Effectiveness of school-based interventions to prevent anxiety & depression in young people. *European Journal of Public Health*, *29*. <https://doi.org/https://doi.org/10.1093/eurpub/ckz185.021>

Kallapiran, K., Koo, S., Kirubakaran, R., & Hancock, K. (2015). Review: Effectiveness of mindfulness in improving mental health symptoms of children and adolescents: A meta-analysis. *Child and Adolescent Mental Health*, *20*(4), 182-194. <https://doi.org/10.1111/camh.12113>

Included in later meta-analysis

Dunning, D. L., Griffiths, K., Kuyken, W., Crane, C., Foulkes, L., Parker, J., & Dalgleish, T. (2019). Research review: The effects of mindfulness‐based interventions on cognition and mental health in children and adolescents – a meta‐analysis of randomized controlled trials. *Journal of Child Psychology and Psychiatry*, *60*(3), 244-258. <https://doi.org/10.1111/jcpp.12980>

**Appendix C**

**Table 2.S1**

*AMSTAR -2 Quality Ratings for reviews*

| **Author & date** | **Am1** | **Am2*** | **Am3** | **Am4*** | **Am5** | **Am6** | **Am7*** | **Am8** | **Am9*** | **Am10** | **Am11*** | **Am12** | **Am13*** | **Am14** | **Am15*** | **Am16** | **Rating** |
| --- | --- | --- | --- | --- | --- | --- | --- | --- | --- | --- | --- | --- | --- | --- | --- | --- | --- |
| Carsley, 2018 | 2 | 0 | 0 | 1 | 2 | 0 | 0 | 2 | 1 | 0 | 2 | 2 | 2 | 2 | 2 | 2 | Critically low |
| Dunning, 2022 | 2 | 2 | 2 | 1 | 2 | 2 | 0 | 2 | 2 | 0 | 2 | 2 | 2 | 2 | 2 | 2 | Moderate |
| Fulambarkar, 2023 | 2 | 0 | 0 | 1 | 2 | 0 | 0 | 2 | 2 | 0 | 2 | 2 | 2 | 2 | 2 | 2 | Low |
| Galla, 2024 | 2 | 2 | 2 | 1 | 2 | 2 | 0 | 2 | 2 | 0 | 2 | 2 | 2 | 2 | 0 | 2 | Low |
| Kander, 2024 | 2 | 2 | 0 | 1 | 0 | 2 | 0 | 2 | 1 | 0 | 2 | 2 | 2 | 2 | 2 | 2 | Low |
| Odgers, 2020 | 2 | 2 | 2 | 1 | 2 | 2 | 0 | 2 | 2 | 0 | 2 | 2 | 2 | 2 | 2 | 2 | Moderate |

*Critical items

Am1: Did the research questions and inclusion criteria for the review include the components of PICO?

Am2*: Did the report of the review contain an explicit statement that the review methods were established prior to the conduct of the review and did the report justify any significant deviations from the protocol?

Am3: Did the review authors explain their selection of the study designs for inclusion in the review?

Am4*: Did the review authors use a comprehensive literature search strategy?

Am5: Did the review authors perform study selection in duplicate?

Am6: Did the review authors perform data extraction in duplicate?

Am7*: Did the review authors provide a list of excluded studies and justify the exclusions?

Am8: Did the review authors describe the included studies in adequate detail?

Am9*: Did the review authors use a satisfactory technique for assessing the risk of bias (RoB) in individual studies?

Am10: Did the review authors report on the sources of funding for the studies included in the review?

Am11*: If meta-analysis was performed, did the review authors use appropriate methods for statistical combination of results?

Am12: If meta-analysis was performed, did the review authors assess the potential impact of RoB in individual studies on the results of the meta-analysis or other evidence synthesis?

Am13*: Did the review authors account for RoB in individual studies when interpreting/discussing the results of the review?

Am14: Did the review authors provide a satisfactory explanation for, and discussion of, any heterogeneity observed in the results of the review?

Am15*: If they performed quantitative synthesis, did the review authors carry out an adequate investigation of publication bias and discuss its likely impact on the results?

Am16: Did the review authors report any potential sources of conflict of interest, including any funding they received for conducting the review?

**Appendix D**

**Table 2.S2**

*GRADE ratings for included reviews*

| Variable | Review | Certainty Assessment | | | | | | Comments | Rating | Overall rating |
| --- | --- | --- | --- | --- | --- | --- | --- | --- | --- | --- |
|  | Study Design | Risk of bias | Inconsistency | Indirectness | Imprecision | Publication bias |
| Wellbeing | Carsley, 2018 | RCTs and non-RCTs | Serious (-1) Variability in methodological quality | Serious (-1) Substantial heterogeneity across studies | Not serious (0) Relevant, good quality outcome measures. | Very serious (-2) Null to moderate effects, with broad confidence intervals; small pooled effect | Not serious (0) Tests suggest low risk of publication bias. | Positive but small and inconsistent effects; wide variation across studies. | Very low ⬤◯◯◯ | Very low ⬤◯◯◯ |
|  | Dunning, 2022 | RCTs | Serious (-1)  Variability in methodological quality of studies | Serious (-1)  Moderate heterogeneity across studies | Not serious (0) Relevant, good quality outcome measures. | Very serious (-2) Small effects, often wide confidence intervals; small pooled effect | Serious (-1) Tests suggest publication bias. | Despite large number of studies, evidence uncertain given study-level variability | Very low ⬤◯◯◯ |
|  | Galla, 2024 | RCTs | Serious (-1) Reanalysis used only RCTs, but variability in methodological quality of studies | Serious (-1) High heterogeneity across studies | Not serious (0) Relevant, good quality outcome measures. | Very serious (-2) Small effects, often wide confidence intervals; small pooled effect | Not serious (0) Publication bias not discussed, but evidence of low risk of bias | Results show a small effect, but variability in primary studies | Very low ⬤◯◯◯ |
|  | Kander, 2024 | RCTs and non-RCTs | Serious (-1) Some studies had methodological limitations; not all met WWC standards. | Not serious (0) No significant heterogeneity across studies | Not serious (0)  Good quality outcome measures | Not serious (0) Small sample size in some studies, moderate confidence intervals. | Not serious (0) Tests suggest low risk of publication bias. | Evidence suggests small positive effects, but certainty reduced due to study-level imprecision. | ⬤⬤⬤◯ Moderate |
|  |  |  |  |  |  |  |  |  |  |  |
| Mindfulness | Dunning, 2022 | RCTs | Serious (-1)  Variability in methodological quality of studies | Serious (-1)  Substantial heterogeneity across studies | Not serious (0)  Relevant, good quality outcome measures. | Very serious (-2) Variability in study effects ranged widely, confidence intervals crossing the null | Serious (-1) Tests suggest publication bias. | Despite a large number of studies, evidence uncertain due to study-level variability. | Very low ⬤◯◯◯ | Very low ⬤◯◯◯ |
| Galla, 2024 | RCTs | Serious (-1) Variability in methodological quality of studies | Serious (-1) Substantial heterogeneity across studies | Not serious (0) Relevant, good quality outcome measures. | Very serious (-2) Small, non-significant effects and broad confidence intervals. Some comparisons not statistically significant. | Not serious (0) Publication bias not discussed, but evidence of low risk of bias | Pooled effect not significant; study-level effects inconsistent. | Very low ⬤◯◯◯ |
| Kander, 2024 | RCTs and non-RCTs | Serious (-1)  Risk of bias from mixed study quality and limited sample sizes. | Serious (-1) Moderate to high heterogeneity across studies | Not serious (0) Relevant, good quality outcome measures. | Very serious (-2) Mostly non-significant effects,wide confidence intervals | Not serious (0) Tests suggest low risk of publication bias. | Pooled effect was not statistically significant; study-level variation and null findings limit certainty. | Low ⬤⬤◯◯ |
|  |  |  |  |  |  |  |  |  |  |  |
| Depression | Dunning, 2022 | RCTs | Serious (-1)  Variability in methodological quality of studies | Serious (-1) Moderate heterogeneity across studies | Not serious (0) Relevant, good quality outcome measures. | Serious (-1) Wide variability in effect sizes, confidence intervals, many crossing the null, small pooled effect | Serious (-1) Tests suggest positive publication bias. | Despite a large number of studies, evidence uncertain due to study-level variability | Very low ⬤◯◯◯ | Very low ⬤◯◯◯ |
| Fulambarkar, 2023 | RCTs | Serious (-1) Variability in methodological quality of studies | Serious (-1) Substantial heterogeneity across studies | Not serious (0) Relevant, good quality outcome measures. | Very serious (-2) Most primary studies non-significant or small effects, wide confidence intervals, often crossing the null. | Not serious (0) Tests showed low risk of publication bias. | The meta-analysis shows a small pooled effect, but imprecision and inconsistency at the study level reduce confidence. | Very low ⬤◯◯◯ |
| Galla, 2024 | RCTs | Serious (-1) Reanalysis used only RCTs, but variability in methodological quality of studies | Not serious (0) Low to moderate heterogeneity across studies | Not serious (0) Relevant, good quality outcome measures. | Very serious (-2) Mostly very small, non-significant effects, wide confidence intervals; small pooled effect | Not serious (0)  Publication bias not discussed, but evidence of low risk of bias | No significant benefit observed in individual studies or pooled analysis; high uncertainty due to imprecision. | Very low ⬤◯◯◯ |
| Kander, 2024 | RCTs and non-RCTs | Serious (-1) Variability in methodological quality of studies | Not serious (0) Low heterogeneity across studies. | Not serious (0) Relevant, good quality outcome measures | Very serious (-2)  Most primary studies had null or near-zero effects, many with wide confidence intervals crossing the null. | Not serious (0) Tests suggest low risk of publication bias. | Very small pooled effect and non-significant results across most studies; confidence intervals varied widely. | Low ⬤⬤◯◯ |
|  |  |  |  |  |  |  |  |  |  |  |
| Anxiety | Dunning, 2022 | RCTs | Serious (-1) Most studies had some concerns or high risk in domains like blinding, attrition, and reporting bias. | Serious (-1) Substantial heterogeneity across studies | Not serious (0) Relevant, good quality outcome measures. | Very serious (-2) Many studies with small, non-significant effects, wide confidence intervals crossing the null, small pooled effect | Serious (-1)  Tests suggest publication bias. | Despite a large number of studies, evidence uncertain due to study-level variability | Very low ⬤◯◯◯ | Very low ⬤◯◯◯ |
| Fulambarkar, 2023 | RCTs | Serious (-1) Most studies had moderate to high risk of bias in domains like allocation concealment, attrition, and reporting. | Serious (-1)  Substantial heterogeneity across studies | Not serious (0) Relevant, good quality outcome measures. | Very serious (-2) Many studies with small effects; confidence intervals wide and crossing the null | Not serious (0) Tests suggest low risk of publication bias. | Pooled effect was non-significant, with wide and inconsistent study-level estimates leading to very low certainty. | Very low ⬤◯◯◯ |
| Galla, 2024 | RCTs | Serious (-1)  Reanalysis used only RCTs, but variability in methodological quality of studies | Not serious (0) Low heterogeneity across studies | Not serious (0) Relevant, good quality outcome measures. | Very serious (-2) Many studies with small effects; confidence intervals | Not serious (0) Publication bias not discussed, but evidence of low risk of bias | Pooled effect was small and only significant in one subgroup; individual study results showed considerable imprecision. | Low ⬤⬤◯◯ |
| Kander, 2024 | RCTs and non-RCTs | Serious (-1) Concerns due to inconsistent study quality; some did not meet full WWC standards or had unclear blinding and reporting. | Serious (-1) Substantial heterogeneity across studies | Not serious (0) Internalizing problems a good fit for anxiety. Relevant, good quality outcome measures. | Very serious (-2)  Many studies with small effects; wide confidence intervals, pooled effect small | Not serious (0) Tests suggest low risk of publication bias. | Effect sizes across studies were inconsistent and mostly non-significant, limiting confidence in any benefit. | Low ⬤⬤◯◯ |
| Odgers, 2020 | RCTs | Serious (-1) Studies showed frequent issues with blinding and high researcher allegiance (60% rated high). | Serious (-1) Substantial heterogeneity across studies | Not serious (0) Relevant, good quality outcome measures. | Very serious (-2)  Many studies with small effects; wide confidence intervals | Not serious (0) Tests suggest low risk of publication bias. | Short-term effects were small and variable across studies; follow-up effects were not significant. | Very low ⬤◯◯◯ |
|  |  |  |  |  |  |  |  |  |  |  |
